# Supplementary material
Source: publisher figshare collection journal article supplement (https://acs.figshare.com/ndownloader/files/17371586)
Supplement: Supplementary file 1 [file 17371586]

# **Supporting Information**

## **Nitrogen-Induced Enhancement of Synaptic Weight Reliability in Titanium-Oxide-based Resistive Artificial Synapse and Demonstration of Reliability Effect on Neuromorphic System**

*June Park,<sup>†</sup> Euyjin Park,<sup>‡</sup> Sungho Kim,<sup>§</sup> and Hyun-Yong Yu<sup>\*†‡</sup>*

<sup>†</sup>Department of Nano Semiconductor Engineering, Korea University, Seoul 136-701,  
Korea

<sup>‡</sup>School of Electrical Engineering, Korea University, Seoul 136-701, Korea

<sup>§</sup>Department of Electrical Engineering, Sejong University, Seoul 05006, Korea

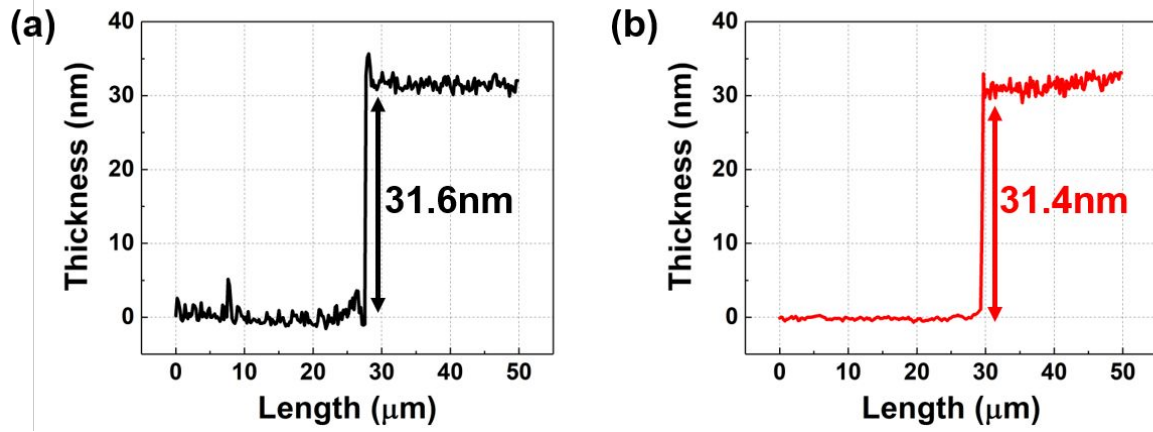

**Figure S1.** AFM data of (a)  $\text{TiO}_x$  and (b)  $\text{TiO}_x\text{:N}$  active layer

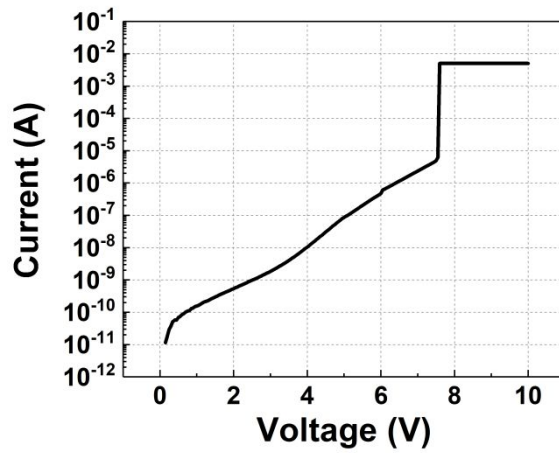

**Figure S2.** I–V characteristic of electroforming process of  $\text{TiO}_x\text{:N}$ -based RAS

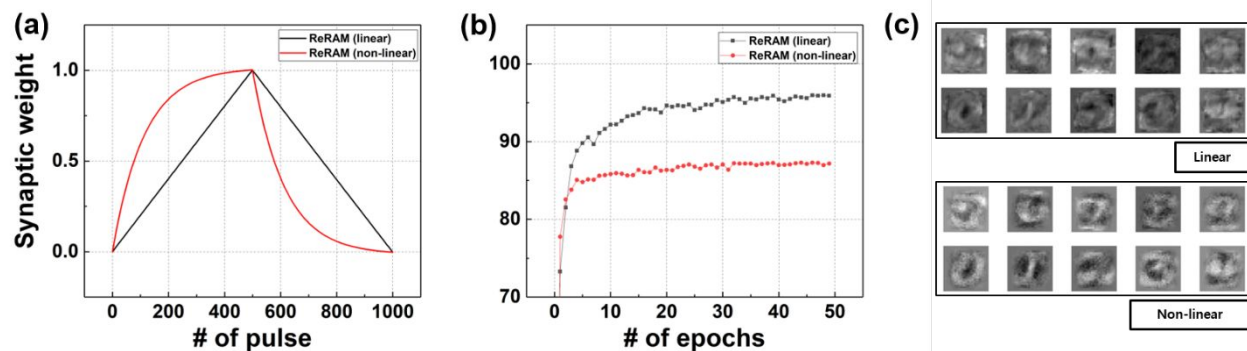

**Figure S3.** (a) exponential function that functionalized the potentiation and depression characteristics of the RAS; (b) pattern recognition accuracy as a function of the number of epochs with different linearity value; (c) synaptic weight map of 78600 synapses after training with different linearity on the simulation

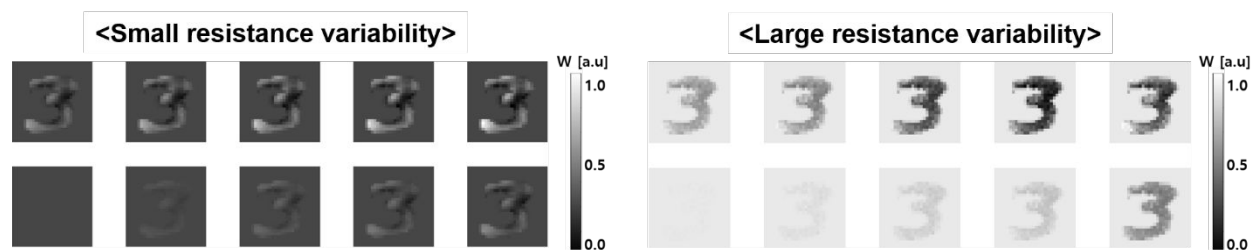

**Figure S4.** synaptic weight map of 78600 synapses after image recognition calculation on the simulation

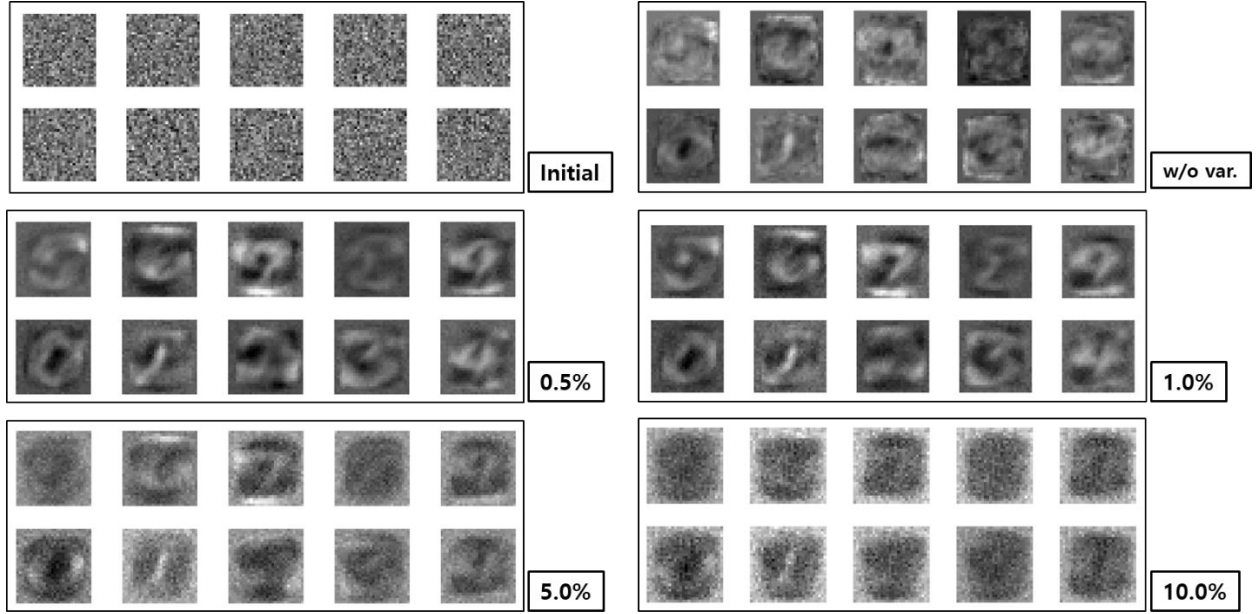

**Figure S5.** synaptic weight map of 78600 synapses after training without variability and with various values of variability on the simulation

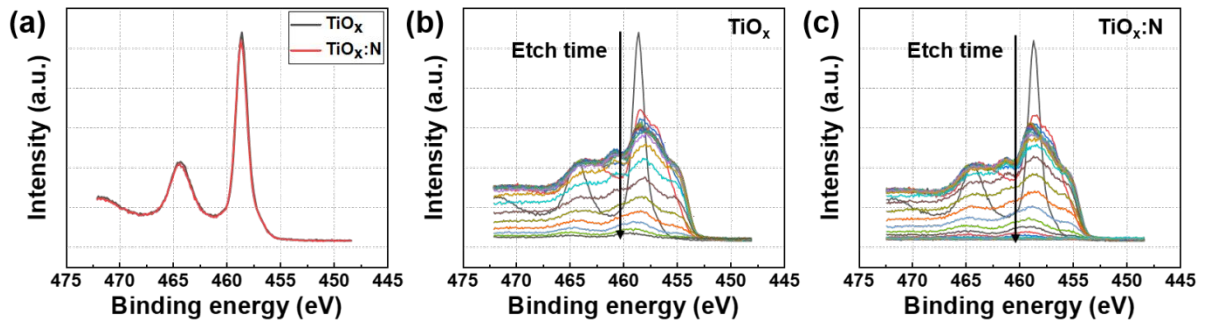

**Figure S6.** (a) Ti 2p peaks of as-dep  $\text{TiO}_x$  and  $\text{TiO}_x\text{:N}$  films; (b) Ti 2p peaks of  $\text{TiO}_x$  through etch time; (c) Ti 2p peaks of  $\text{TiO}_x\text{:N}$  through etch time
